# Supplementary material for: A 3D walking palm-like core–shell CoMoO4@NiCo2S4@nickel foam composite for high-performance supercapacitors
Source: Royal Society of Chemistry journal article supplement (doi:10.1039/c8dt04045a), 2019-01-01
Supplement: c8dt04045a1.pdf [file c8dt04045a1.pdf]

## Supplementary Information

### 3D Walking Palm-like Core-Shell $\text{CoMoO}_4@\text{NiCo}_2\text{S}_4@\text{Nickel Foam}$ Composite for High-performance Supercapacitors

Iftikhar Hussain <sup>a</sup>, Awais Ali<sup>a</sup>, Charmaine Lamiel <sup>a</sup>, Saad Gomaa Mohamed <sup>a, b</sup>, Sumanta Sahoo <sup>a</sup>, Jae-Jin Shim<sup>a,\*</sup>

<sup>a</sup> School of Chemical Engineering, Yeungnam University, Gyeongsan, Gyeongbuk 38541, Republic of Korea

<sup>b</sup> Mining and Metallurgy Engineering Department, Tabbin Institute for Metallurgical Studies, (TIMS), Tabbin, Helwan 109, Cairo 11421, Egypt

\*Corresponding author: jjshim@yu.ac.kr (Prof. J.J. Shim)

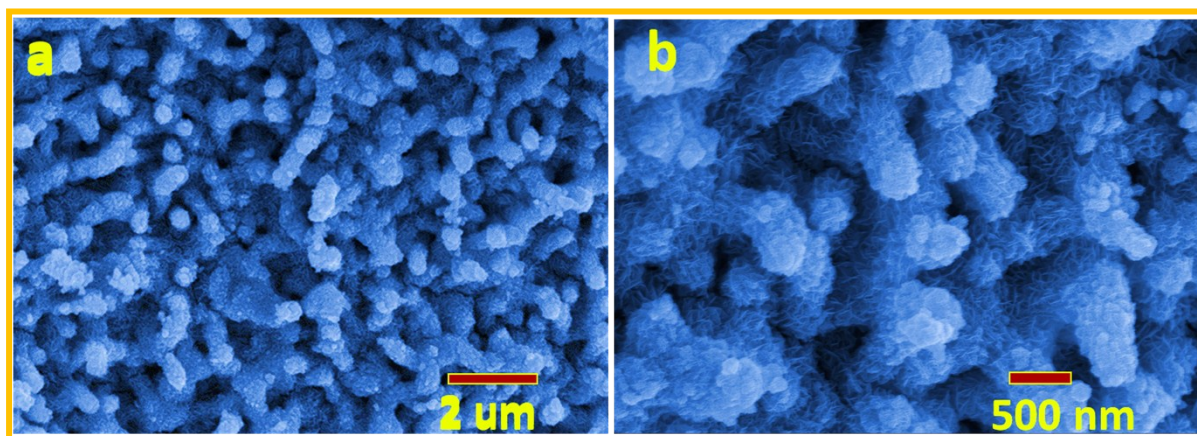

**Fig. S1** SEM images of walking palm-like core-shell  $\text{CoMoO}_4@\text{NiCo}_2\text{S}_4@\text{NF}$  after 2 h of reaction at low (a) and high (b) magnifications.

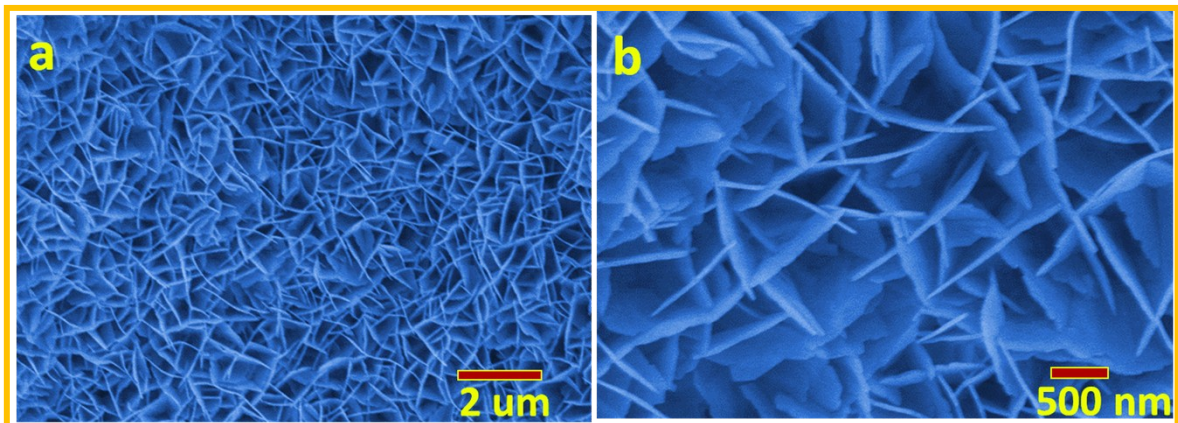

Fig. S2 SEM images of  $\text{CoMoO}_4@\text{NF}$  at low (a) and high (b) magnifications.

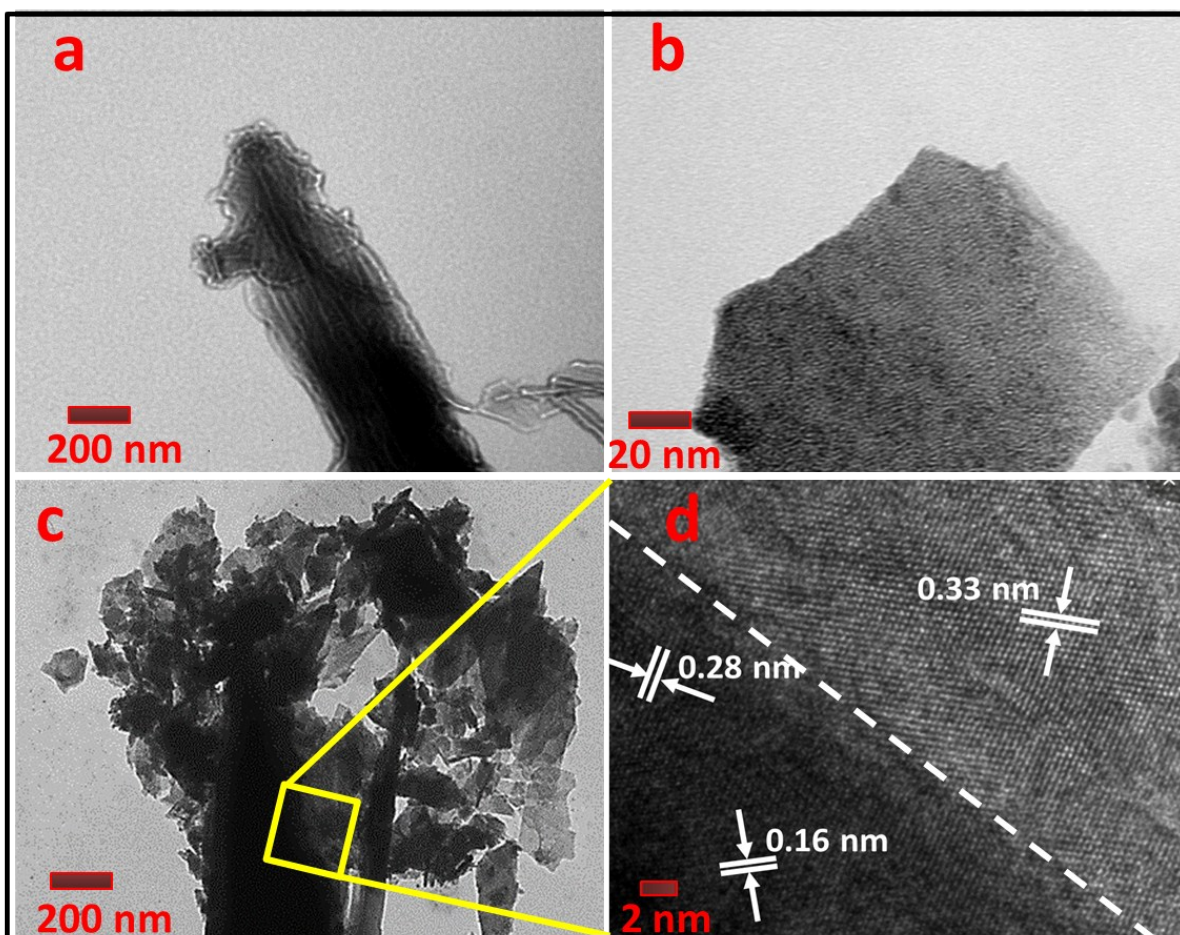

Fig. S3. TEM images of  $\text{NiCo}_2\text{S}_4$  (a),  $\text{CoMoO}_4$  (b), and walking palm-like core-shell  $\text{CoMoO}_4@\text{NiCo}_2\text{S}_4$  (c); and HRTEM image of walking palm-like core-shell  $\text{CoMoO}_4@\text{NiCo}_2\text{S}_4$  (d).

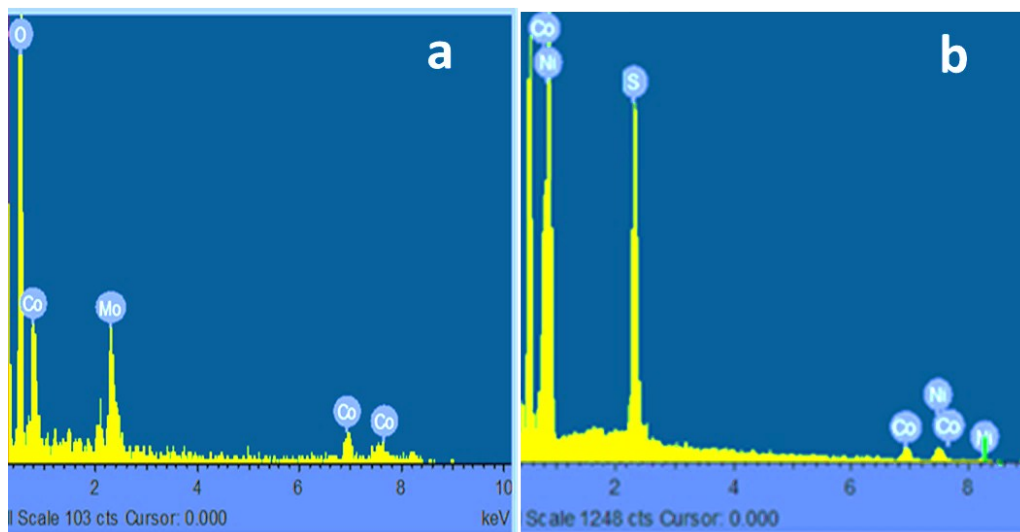

**Fig. S4** EDS spectra of CoMoO<sub>4</sub>@NF (a) and NiCo<sub>2</sub>S<sub>4</sub>@NF (b).

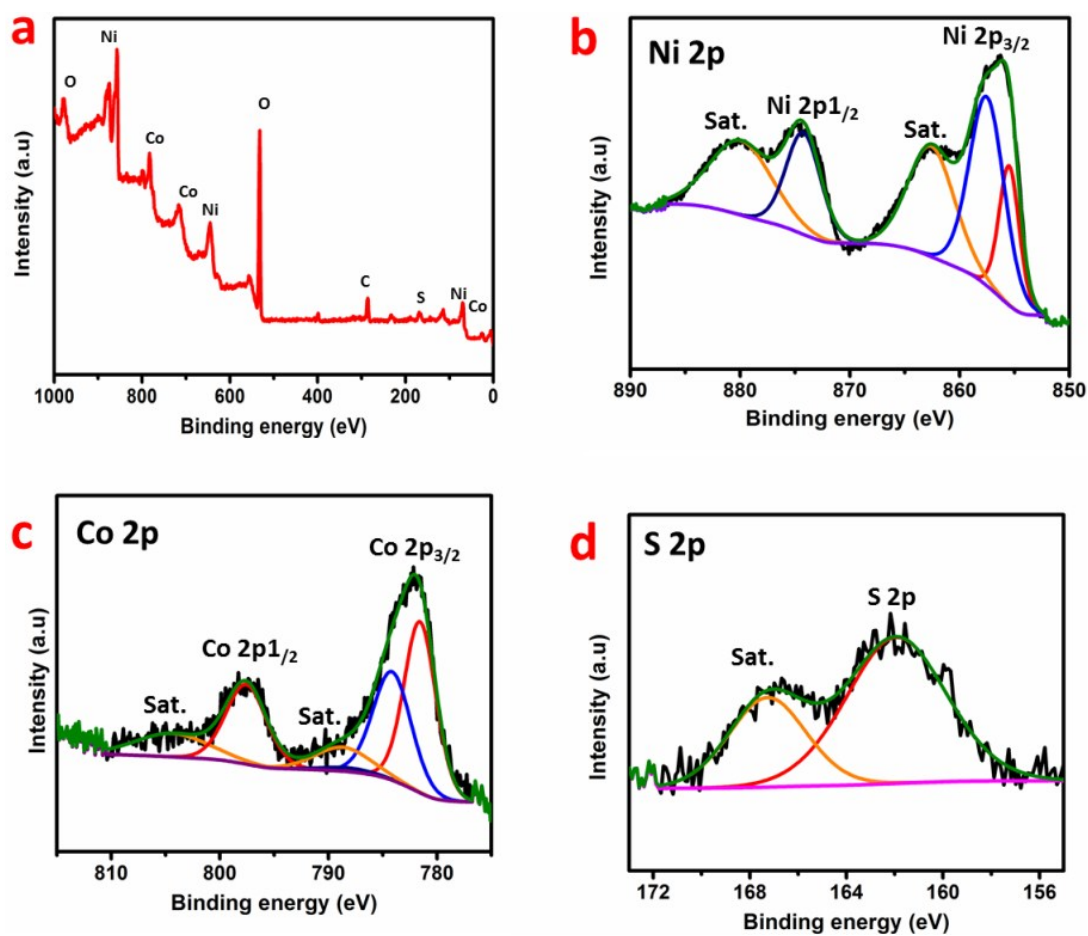

**Fig. S5** XP spectra of the as-prepared NiCo<sub>2</sub>S<sub>4</sub>@NF: (a) survey, (b) Ni 2p, (c) Co 2p, and (d) S 2p.

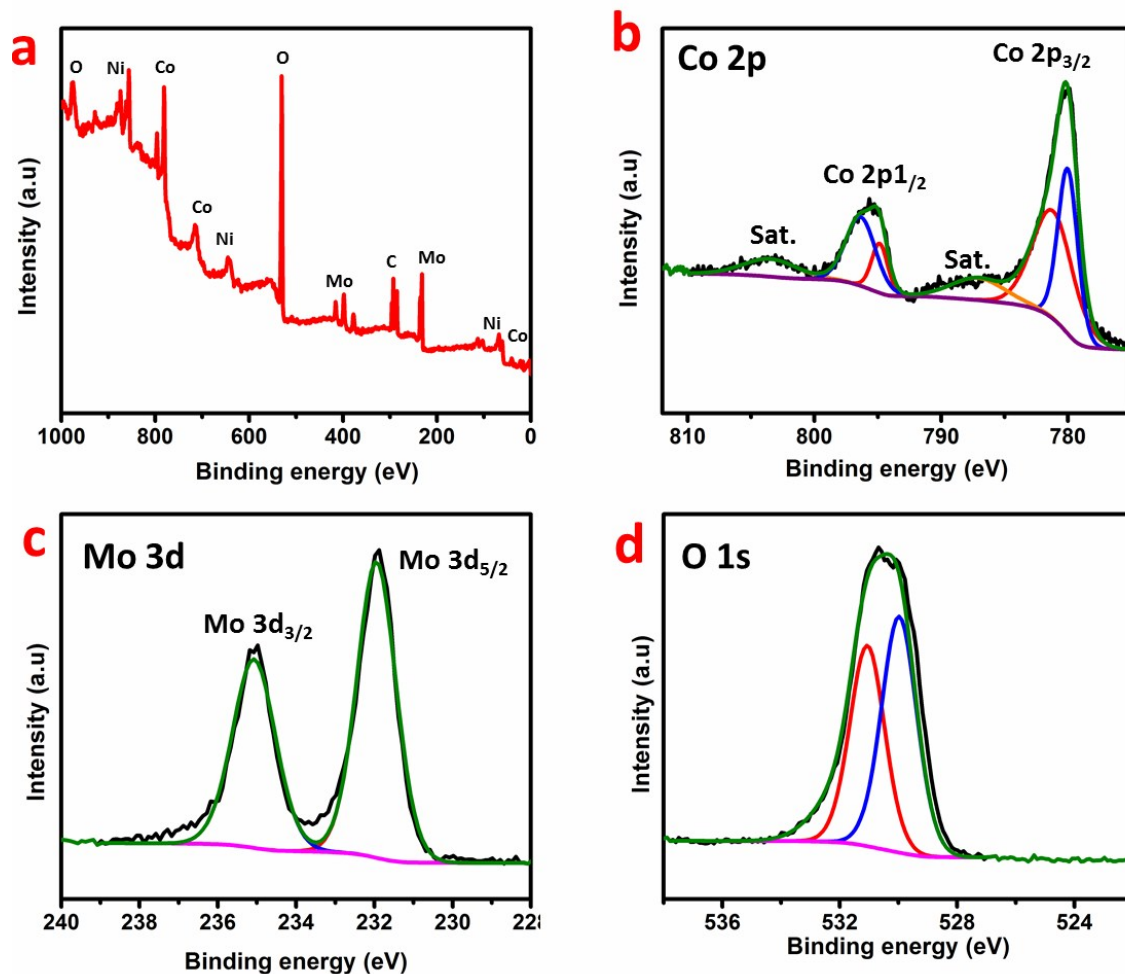

Fig. S6 XPS spectra of the as-prepared CoMoO<sub>4</sub>@NF: (a) survey, (b) Co 2p, (c) Mo 3d, and (d) O 1s.

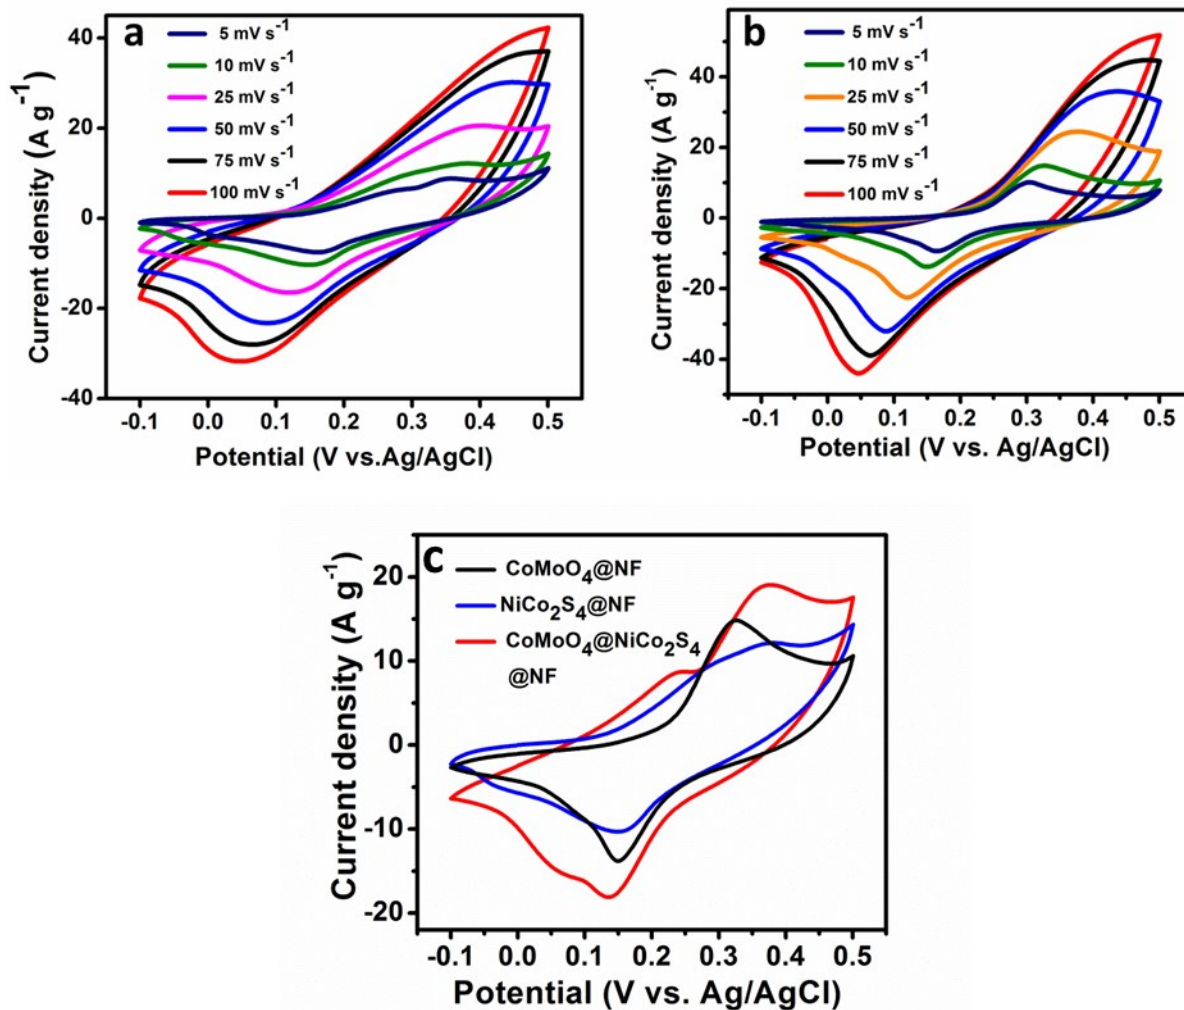

Fig. S7 CV curves of (a) NiCo<sub>2</sub>S<sub>4</sub>@NF and (b) CoMoO<sub>4</sub>@NF at scan rates in the range of 5 to 100 mV s<sup>-1</sup> and (c) CV curves based on active masses of electrode materials.

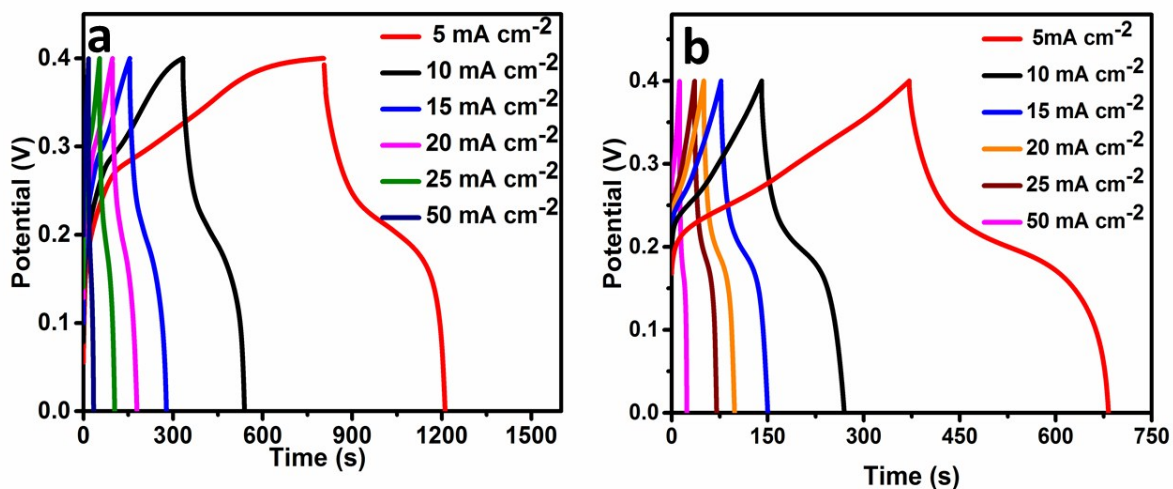

Fig. S8 GCD curves of NiCo<sub>2</sub>S<sub>4</sub>@NF (a) and CoMoO<sub>4</sub>@NF (b) at current densities in the range of 5 to 10 mA cm<sup>-1</sup>.

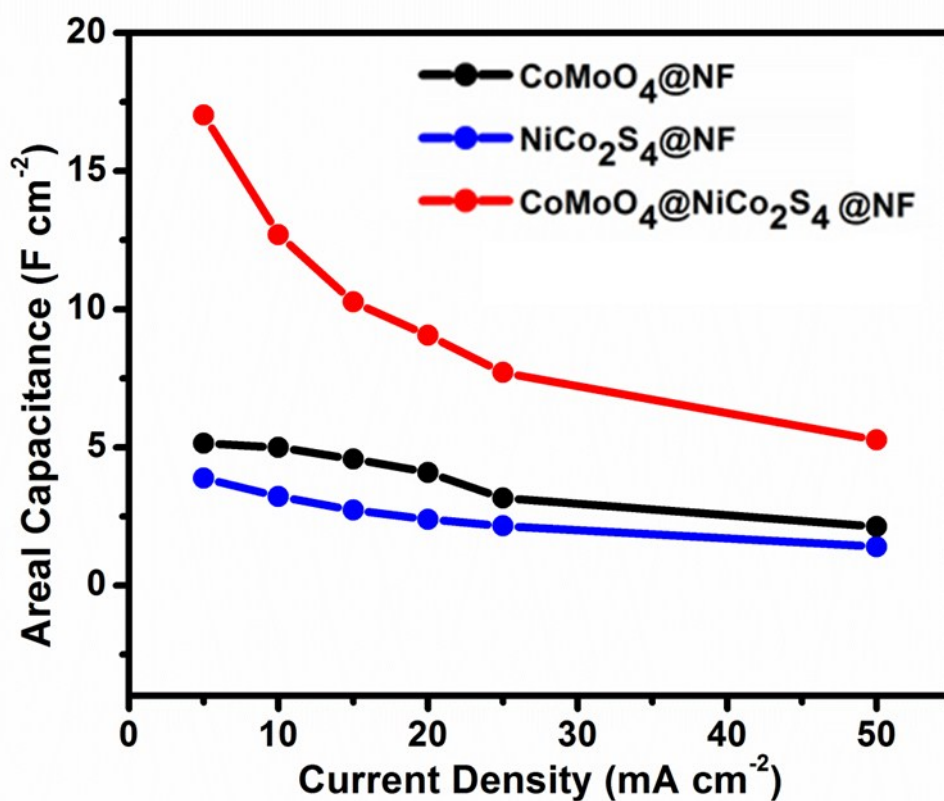

Fig. S9 Areal capacitances of CoMoO<sub>4</sub>@NiCo<sub>2</sub>S<sub>4</sub>@NF, NiCo<sub>2</sub>S<sub>4</sub>@NF, and CoMoO<sub>4</sub>@NF at different current densities.

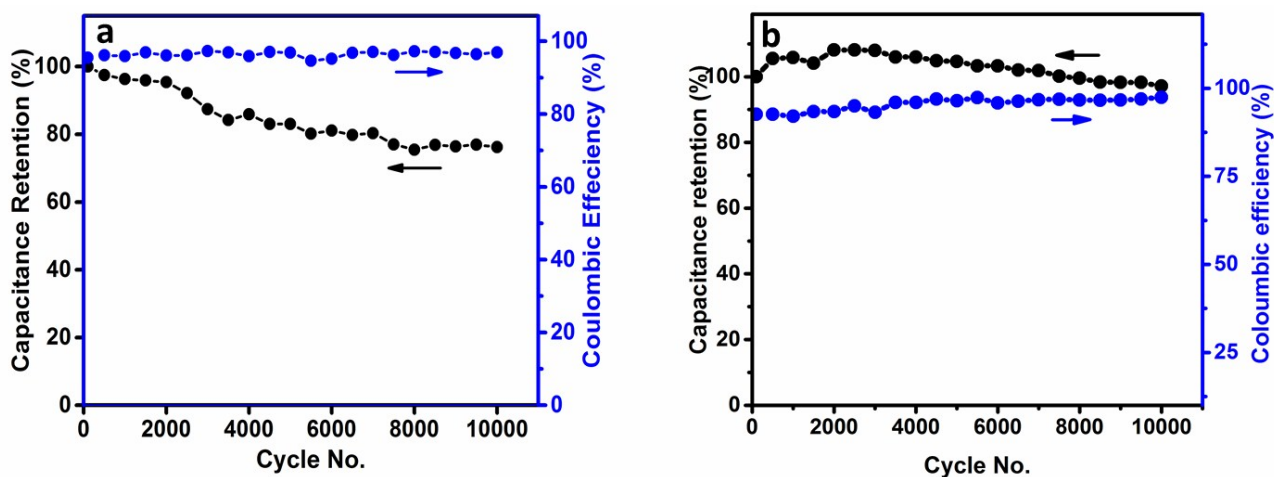

Fig. S10 Capacitance retention and coulombic efficiency of NiCo<sub>2</sub>S<sub>4</sub>@NF (a) and CoMoO<sub>4</sub>@NF (b) for 10,000 cycles.

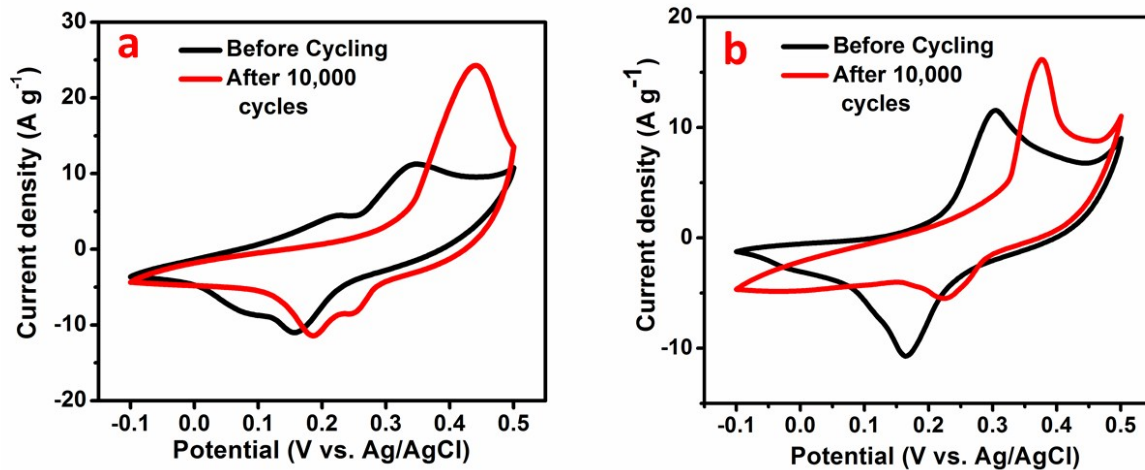

**Fig. S11** CV curves of walking palm-like core-shell CoMoO<sub>4</sub>@NiCo<sub>2</sub>S<sub>4</sub>@NF (a) and CoMoO<sub>4</sub>@NF (b) before the cycling test and after 10,000 cycles.

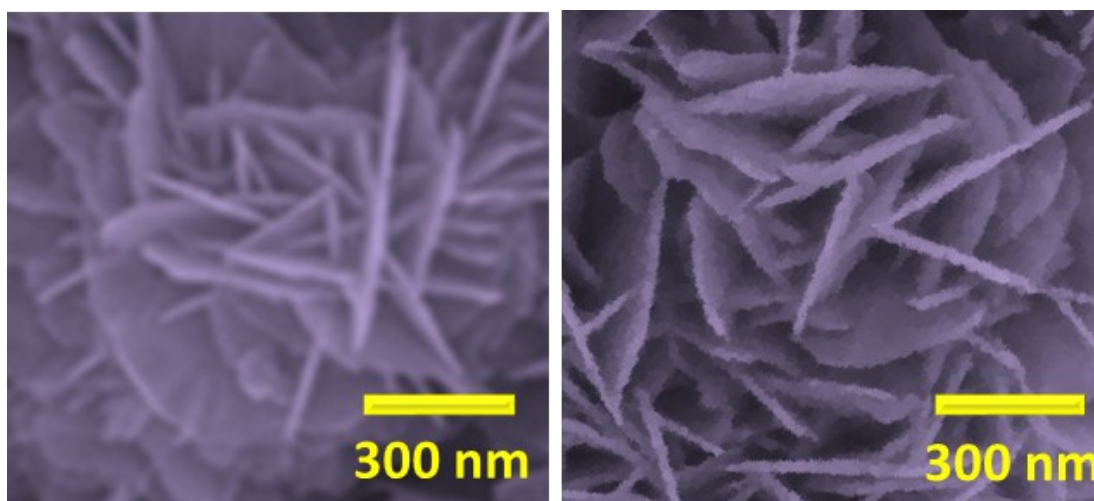

**Fig. S12** SEM images of walking palm-like CoMoO<sub>4</sub>@NiCo<sub>2</sub>S<sub>4</sub>@NF before cycling (a) and after 10,000 cycles (b).

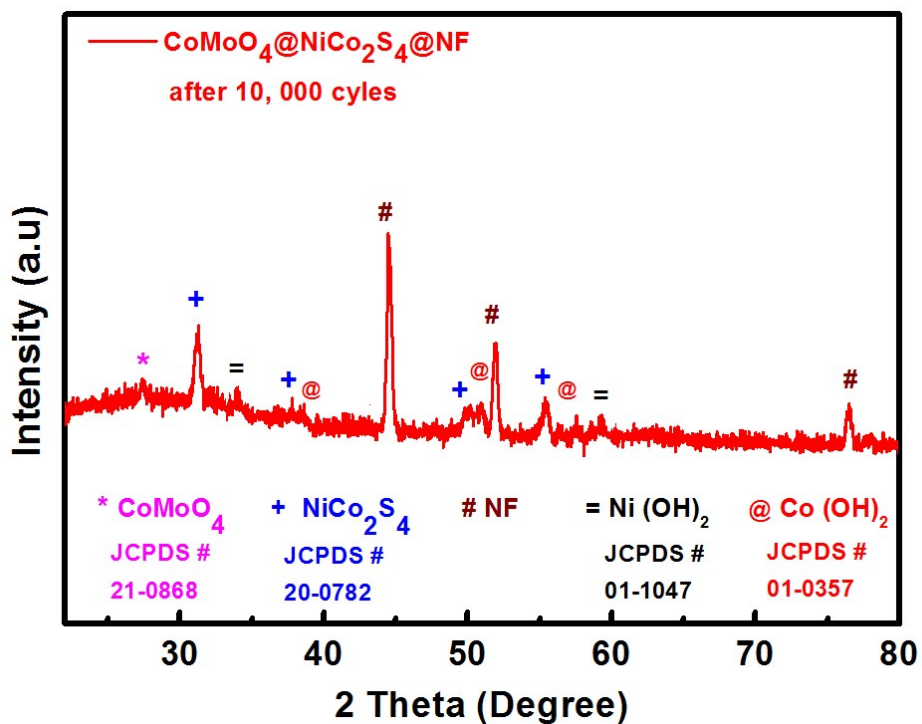

Fig. S13 XRD pattern of walking palm-like core-shell CoMoO<sub>4</sub>@NiCo<sub>2</sub>S<sub>4</sub>@NF after 10,000 cycles.

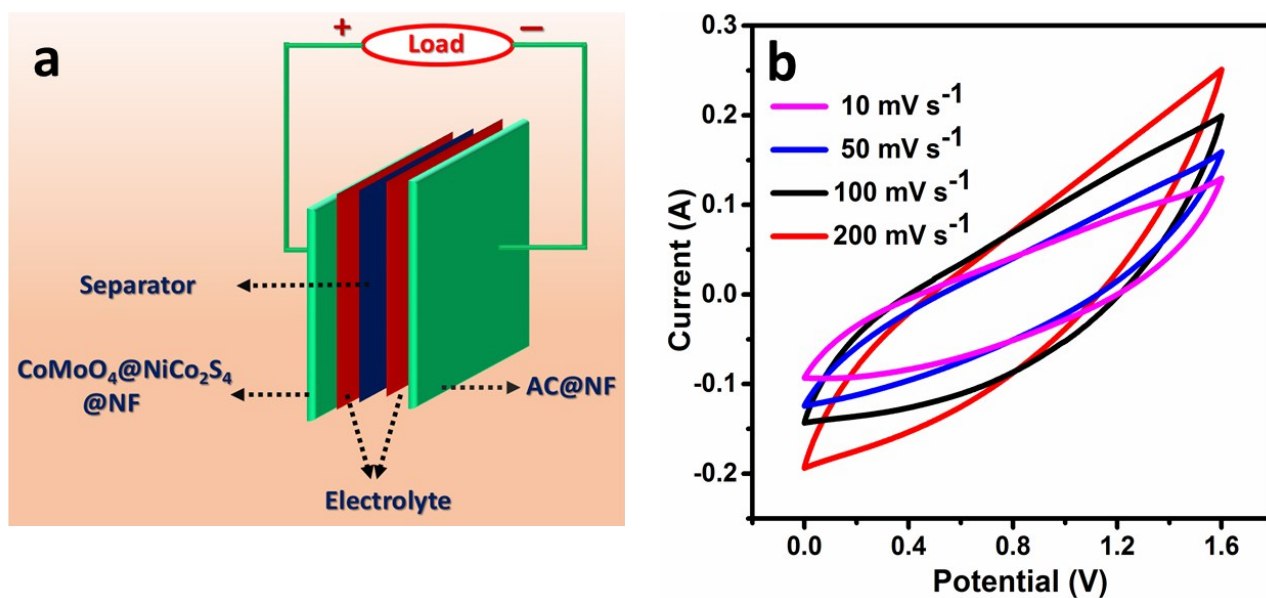

Fig. S14 (a) Schematic diagram of the fabricated ASC device, (b) CV curves of the ASC device at different scan rates.



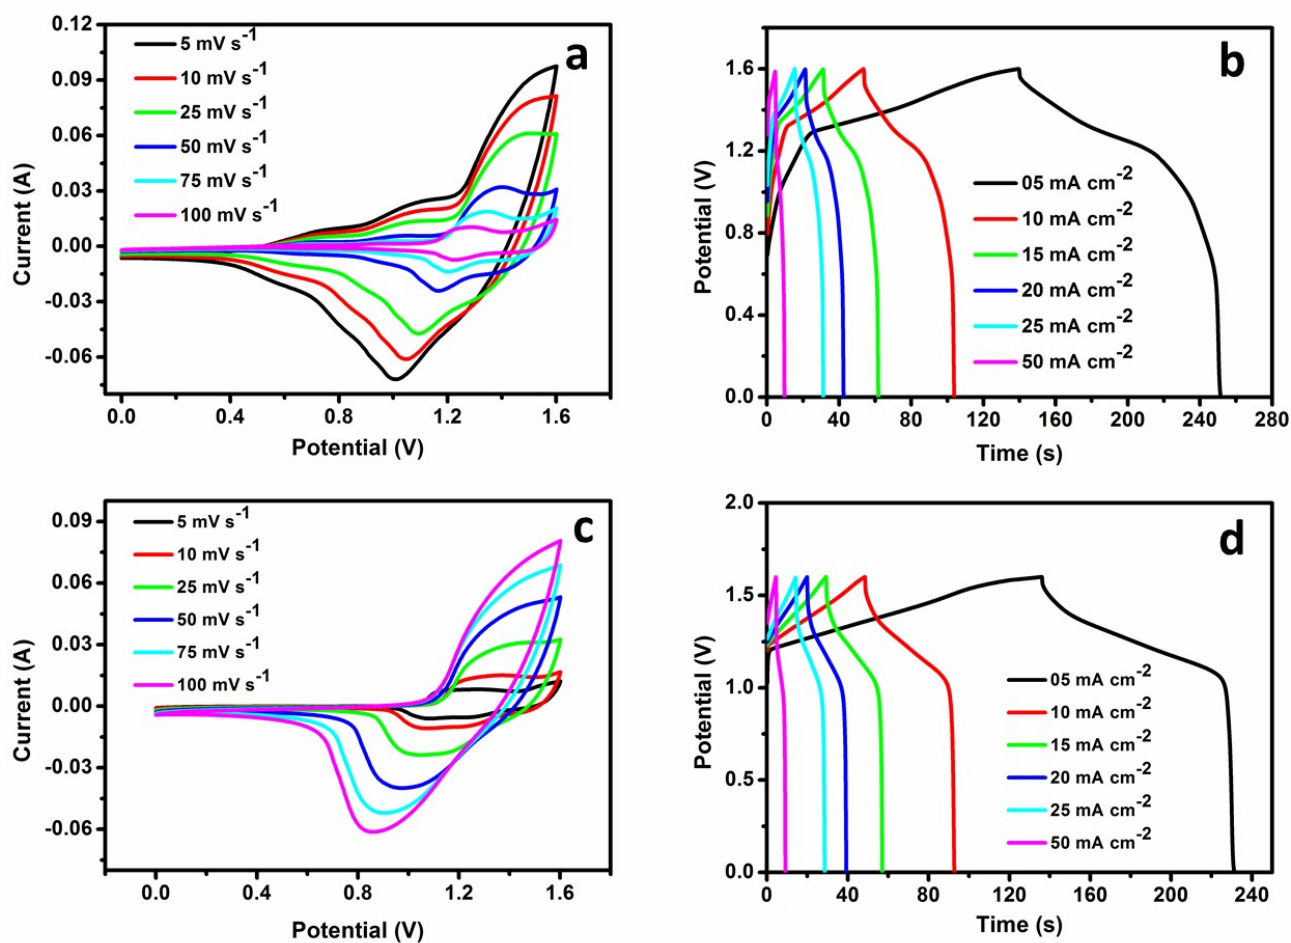

**Fig. 15** CV curves at different scan rates (a) and GCD curves at different current densities (b), both for the  $\text{NiCo}_2\text{S}_4@\text{NF}//\text{AC}@\text{NF}$  ASC device; CV curves at different scan rates (c) and GCD curves at different current densities (d), both for the  $\text{CoMoO}_4@\text{NF}//\text{AC}@\text{NF}$  ASC device.

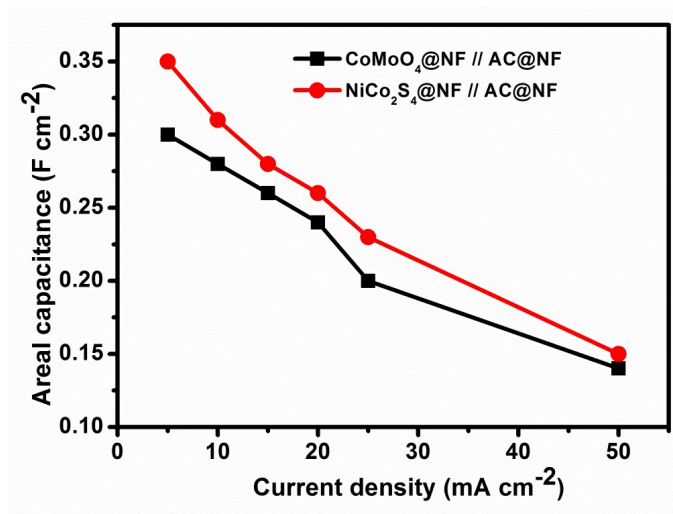

**Fig. S16** Areal capacitances of  $\text{NiCo}_2\text{S}_4@\text{NF}//\text{AC}@\text{NF}$  and  $\text{CoMoO}_4@\text{NF}//\text{AC}@\text{NF}$  ASC devices at different current densities.

**Table S1. Comparison for energy and power densities of different NiCo<sub>2</sub>S<sub>4</sub> and CoMoO<sub>4</sub> asymmetric supercapacitor device**

| Supercapacitor device                                       | Electrolyte   | Potential window (V) | C <sub>a</sub> , (F cm <sup>-2</sup> )  | ED (Wh kg <sup>-1</sup> ) | PD at max ED (kW kg <sup>-1</sup> ) | Ref. No.         |
|-------------------------------------------------------------|---------------|----------------------|-----------------------------------------|---------------------------|-------------------------------------|------------------|
| NiCo <sub>2</sub> S <sub>4</sub> @PPy //AC                  | 3M KOH        | 0 to 1.6             | 3.24<br>at 5 mA cm <sup>-2</sup>        | 34.6                      | 0.12                                | S1               |
| NiCo <sub>2</sub> S <sub>4</sub> @NiO //AC                  | 3M KOH        | 0 to 1.6             | 0.59<br>at 2 mA cm <sup>-2</sup>        | 30.3                      | 0.28                                | S2               |
| NiCo <sub>2</sub> S <sub>4</sub> @PANI // Graphene          | 6M KOH        | 0 to 1.6             | 2.1<br>at 5 mA cm <sup>-2</sup>         | 64.9                      | 0.27                                | S3               |
| CoMoO <sub>4</sub> @NiMoO <sub>4</sub> //AC                 | 2M KOH        | 0 to 1.6             | NA                                      | 28.7                      | 0.26                                | S4               |
| <b>NiCo<sub>2</sub>S<sub>4</sub>//AC</b>                    | <b>3M KOH</b> | <b>0 to 1.6</b>      | <b>0.35</b><br>at 5 mA cm <sup>-2</sup> | <b>22.5</b>               | <b>0.73</b>                         | <b>This work</b> |
| <b>CoMoO<sub>4</sub>//AC</b>                                | <b>3M KOH</b> | <b>0 to 1.6</b>      | <b>0.29</b><br>at 5 mA cm <sup>-2</sup> | <b>19.0</b>               | <b>0.72</b>                         | <b>This work</b> |
| <b>CoMoO<sub>4</sub>@NiCo<sub>2</sub>S<sub>4</sub> //AC</b> | <b>3M KOH</b> | <b>0 to 1.6</b>      | <b>4.18</b><br>at 5 mA cm <sup>-2</sup> | <b>60.2</b>               | <b>0.18</b>                         | <b>This work</b> |

C<sub>a</sub>: Areal capacitance, ED: Energy density, PD: Power density

S1. M. L. Yan, Y. D. Yao, J. Q. Wen, L. Long, M. L. Kong, G. G. Zhang, X. M. Liao, G. F. Yin and Z. B. Huang, *ACS Appl. Mater. Interfaces*, 2016, **8**, 24525-24535.

S2. Y. Y. Huang, T. L. Shi, S. L. Jiang, S. Y. Cheng, X. X. Tao, Y. Zhong, G. L. Liao and Z. R. Tang, *Sci. Rep-Uk*, 2016, **6**.

S3. Liu, X., Wu, Z., Yin, Y., *Chem. Eng. J.*, 2017, **323**, 330-339.

S4. Z. Q. Zhang, H. D. Zhang, X. Y. Zhang, D. Y. Yu, Y. Ji, Q. S. Sun, Y. Wang and X. Y. Liu, *J. Mater. Chem. A*, 2016, **4**, 18578-18584.
